# Supplementary material for: Behavioral and Psychiatric Symptoms in Prion Disease
Source: Atypon-hosted journal article supplement (doi:10.1176/appi.ajp.2013.12111460), 2014-03-01
Supplement: 265_ds001.pdf [file 265_ds001.pdf]

## Supplementary Tables

### A. Logistic regression for variables affecting presence of psychotic features in all types of prion disease (in 279 patients)

| Independent variables |           | Total<br>n | With psychotic features |        | Logistic Regression |                      |                  |
|-----------------------|-----------|------------|-------------------------|--------|---------------------|----------------------|------------------|
|                       |           |            | n                       | %      | Odds Ratio          | 95% CI               | p value          |
| <b>Diagnosis</b>      | sCJD      | 170        | 70                      | 41.18% | <b>1</b>            | <b>(ref)</b>         | <b>0.001</b>     |
|                       | vCJD      | 25         | 12                      | 48.00% | 0.654               | 0.175 - 2.443        | 0.528            |
|                       | iCJD      | 7          | 1                       | 14.29% | <b>0.1</b>          | <b>0.01 - 0.955</b>  | <b>0.045</b>     |
|                       | IPD OPRI  | 29         | 7                       | 24.14% | <b>0.239</b>        | <b>0.075 - 0.767</b> | <b>0.016</b>     |
|                       | IPD Point | 48         | 9                       | 18.75% | <b>0.189</b>        | <b>0.075 - 0.476</b> | <b>&lt;0.001</b> |
| <b>Age at Onset</b>   | Per year  |            |                         |        | 0.979               | 0.953 - 1.006        | 0.125            |
| <b>PRNP Codon 129</b> | MM        | 159        | 54                      | 33.96% | <b>1</b>            | <b>(ref)</b>         | <b>0.008</b>     |
|                       | MV        | 83         | 37                      | 44.58% | 1.959               | 1.064 - 3.607        | <b>0.031</b>     |
|                       | VV        | 37         | 8                       | 21.62% | 0.488               | 0.201 - 1.181        | 0.112            |
| <b>Gender</b>         | Male      | 134        | 50                      | 37.31% | <b>1</b>            | <b>(ref)</b>         |                  |
|                       | Female    | 145        | 49                      | 33.79% | 0.944               | 0.556 - 1.601        | 0.831            |
| <b>Constant</b>       |           |            |                         |        | 2.646               |                      | 0.303            |

### B. Logistic regression for variables affecting presence of mood disorder in all types of prion disease (in 279 patients)

| Independent variables |           | Total<br>n | With mood disorder |        | Logistic Regression |                      |              |
|-----------------------|-----------|------------|--------------------|--------|---------------------|----------------------|--------------|
|                       |           |            | n                  | %      | Odds Ratio          | 95% CI               | p value      |
| <b>Diagnosis</b>      | sCJD      | 170        | 57                 | 33.53% | <b>1</b>            | ref                  | 0.372        |
|                       | vCJD      | 25         | 17                 | 68.00% | 3.044               | 0.838 - 11.054       | 0.091        |
|                       | iCJD      | 7          | 4                  | 57.14% | 1.689               | 0.326 - 8.741        | 0.532        |
|                       | IPD OPRI  | 29         | 15                 | 51.72% | 1.555               | 0.559 - 4.327        | 0.397        |
|                       | IPD Point | 48         | 28                 | 58.33% | 1.96                | 0.917 - 4.192        | 0.083        |
| <b>Age at Onset</b>   | Per year  |            |                    |        | 0.984               | 0.96 - 1.009         | 0.204        |
| <b>PRNP Codon 129</b> | MM        | 159        | 67                 | 42.14% | <b>1</b>            | ref                  | 0.11         |
|                       | MV        | 83         | 43                 | 51.81% | 1.684               | 0.933 - 3.037        | 0.083        |
|                       | VV        | 37         | 11                 | 29.73% | 0.76                | 0.331 - 1.745        | 0.517        |
| <b>Gender</b>         | Male      | 134        | 53                 | 39.55% | <b>1</b>            | <b>(ref)</b>         |              |
|                       | Female    | 145        | 68                 | 46.90% | <b>1.68</b>         | <b>1.002 - 2.818</b> | <b>0.049</b> |
| <b>Constant</b>       |           |            |                    |        | 0.955               |                      | 0.958        |

**C. Logistic regression for variables affecting presence of agitated features in all types of prion disease (in 279 patients)**

| Independent variables |           | Total | With agitated features |        | Logistic Regression |                      |             |
|-----------------------|-----------|-------|------------------------|--------|---------------------|----------------------|-------------|
|                       |           | n     | n                      | %      | Odds Ratio          | 95% CI               | p value     |
| <b>Diagnosis</b>      | sCJD      | 170   | 28                     | 16.47% | 1                   | ref                  | 0.657       |
|                       | vCJD      | 25    | 8                      | 32.00% | 0.615               | 0.135 - 2.81         | 0.531       |
|                       | iCJD      | 7     | 0                      | 0.00%  | <0.001              | 0 - ???              | 0.999       |
|                       | IPD OPRI  | 29    | 10                     | 34.48% | 1.067               | 0.322 - 3.531        | 0.916       |
|                       | IPD Point | 48    | 7                      | 14.58% | 0.511               | 0.18 - 1.45          | 0.207       |
| <b>Age at Onset</b>   | Per year  |       |                        |        | <b>0.966</b>        | <b>0.936 - 0.997</b> | <b>0.03</b> |
| <b>PRNP Codon 129</b> | MM        | 159   | 35                     | 22.01% | 1                   | ref                  | 0.699       |
|                       | MV        | 83    | 13                     | 15.66% | 0.763               | 0.359 - 1.618        | 0.48        |
|                       | VV        | 37    | 5                      | 13.51% | 0.711               | 0.245 - 2.068        | 0.531       |
| <b>Gender</b>         | Male      | 134   | 27                     | 20.15% |                     |                      |             |
|                       | Female    | 145   | 26                     | 17.93% | 0.961               | 0.511 - 1.809        | 0.902       |
| <b>Constant</b>       |           |       |                        |        | 2.172               |                      | 0.476       |

**D. Logistic regression for variables affecting presence of BPS at onset in all types of prion disease (in 279 patients)**

| Independent variables |           | Total | With BPS at onset |        | Logistic Regression |                      |              |
|-----------------------|-----------|-------|-------------------|--------|---------------------|----------------------|--------------|
|                       |           | n     | n                 | %      | Odds Ratio          | 95% CI               | p value      |
| <b>Diagnosis</b>      | sCJD      | 170   | 74                | 43.53% | 1                   | (ref)                | <0.001       |
|                       | vCJD      | 25    | 23                | 92.00% | 9.682               | 1.687 - 55.584       | 0.011        |
|                       | iCJD      | 7     | 2                 | 28.57% | 0.359               | 0.06 - 2.159         | 0.263        |
|                       | IPD OPRI  | 29    | 16                | 55.17% | 1.105               | 0.396 - 3.081        | 0.848        |
|                       | IPD Point | 48    | 11                | 22.92% | <b>0.297</b>        | <b>0.128 - 0.692</b> | <b>0.005</b> |
| <b>Age at Onset</b>   | Per year  |       |                   |        | 0.991               | 0.966 - 1.017        | 0.493        |
| <b>PRNP Codon 129</b> | MM        | 159   | 80                | 50.31% | 1                   | (ref)                | 0.071        |
|                       | MV        | 83    | 37                | 44.58% | 1.205               | 0.667 - 2.176        | 0.537        |
|                       | VV        | 37    | 9                 | 24.32% | <b>0.425</b>        | <b>0.182 - 0.990</b> | <b>0.047</b> |
| <b>Gender</b>         | Male      | 134   | 66                | 49.25% | 1                   | (ref)                |              |
|                       | Female    | 145   | 60                | 41.38% | 0.907               | 0.54 - 1.525         | 0.714        |
| <b>Constant</b>       |           |       |                   |        | 1.614               |                      | 0.601        |

**E. Logistic regression for variables affecting presence of BPS at onset in sCJD (in 103 patients)**

| Independent variables |          | Total    |    | With BPS at onset |        | Logistic Regression |                      |             |
|-----------------------|----------|----------|----|-------------------|--------|---------------------|----------------------|-------------|
|                       |          | n        |    | n                 | %      | Odds Ratio          | 95% CI               | p value     |
| <b>Age at Onset</b>   | Per year |          |    |                   |        | <b>0.935</b>        | <b>0.889 - 0.984</b> | <b>0.01</b> |
| <b>PRNP Codon 129</b> | MM       | 46       |    | 19                | 41.30% | 1                   | (ref)                | 0.333       |
|                       | MV       | 33       |    | 17                | 51.52% | 1.197               | 0.447 - 3.210        | 0.72        |
|                       | VV       | 24       |    | 6                 | 25.00% | 0.464               | 0.135 - 1.594        | 0.223       |
| <b>Gender</b>         | Male     | 46       |    | 20                | 43.48% | 1                   | (ref)                |             |
|                       | Female   | 57       |    | 22                | 38.60% | 0.945               | 0.387 - 2.311        | 0.902       |
| <b>MRI</b>            | Striatum | Abnormal | 79 | 32                | 40.51% | 0.826               | 0.204 - 3.352        | 0.789       |
|                       |          | Normal   | 24 | 10                | 41.67% |                     |                      |             |
|                       | Thalamus | Abnormal | 60 | 24                | 40.00% | 0.813               | 0.266 - 2.484        | 0.717       |
|                       |          | Normal   | 43 | 18                | 41.86% |                     |                      |             |
|                       | Cortex   | Abnormal | 83 | 36                | 43.37% | 1.205               | 0.342 - 4.242        | 0.771       |
|                       |          | Normal   | 20 | 6                 | 30.00% |                     |                      |             |
| <b>Constant</b>       |          |          |    |                   |        | 65.816              |                      | 0.033       |

**F. Logistic regression for variables affecting presence of psychotic features in sCJD (in 103 patients)**

| Independent variables |          | Total    |    | With psychotic features |        | Logistic Regression |               |              |
|-----------------------|----------|----------|----|-------------------------|--------|---------------------|---------------|--------------|
|                       |          | n        |    | n                       | %      | Odds Ratio          | 95% CI        | p value      |
| <b>Age at Onset</b>   | Per year |          |    |                         |        | 0.962               | 0.917 - 1.009 | 0.113        |
| <b>PRNP Codon 129</b> | MM       | 46       |    | 19                      | 41.30% | 1                   | (ref)         | <b>0.048</b> |
|                       | MV       | 33       |    | 20                      | 60.61% | 2.031               | 0.759 - 5.436 | 0.158        |
|                       | VV       | 24       |    | 6                       | 25.00% | 0.411               | 0.121 - 1.387 | 0.152        |
| <b>Gender</b>         | Male     | 46       |    | 19                      | 41.30% | 1                   | (ref)         |              |
|                       | Female   | 57       |    | 26                      | 45.61% | 1.632               | 0.665 - 4.003 | 0.285        |
| <b>MRI</b>            | Striatum | Abnormal | 79 | 35                      | 44.30% | 1.257               | 0.318 - 4.974 | 0.744        |
|                       |          | Normal   | 24 | 10                      | 41.67% |                     |               |              |
|                       | Thalamus | Abnormal | 60 | 27                      | 45.00% | 0.816               | 0.271 - 2.456 | 0.717        |
|                       |          | Normal   | 43 | 18                      | 41.86% |                     |               |              |
|                       | Cortex   | Abnormal | 83 | 38                      | 45.78% | 0.961               | 0.281 - 3.284 | 0.95         |
|                       |          | Normal   | 20 | 7                       | 35.00% |                     |               |              |
| <b>Constant</b>       |          |          |    |                         |        |                     |               |              |

**G. Logistic regression for variables affecting presence of mood disorder in sCJD (in 103 patients)**

| Independent variables |          | Total    |    | With BPS at onset |            | Logistic Regression |               |         |
|-----------------------|----------|----------|----|-------------------|------------|---------------------|---------------|---------|
|                       |          | n        |    | n                 | %          | Odds Ratio          | 95% CI        | p value |
| <b>Age at Onset</b>   | Per year |          |    |                   |            | 0.961               | 0.914 - 1.01  | 0.116   |
| <b>PRNP Codon 129</b> | MM       | 46       |    | 14                | 30.43%     | 1                   | (ref)         | 0.599   |
|                       | MV       | 33       |    | 12                | 36.36%     | 1.522               | 0.538 - 4.304 | 0.428   |
|                       | VV       | 24       |    | 7                 | 29.17%     | 0.824               | 0.239 - 2.845 | 0.76    |
| <b>Gender</b>         | Male     | 46       |    | 12                | 26.09%     | 1                   | (ref)         |         |
|                       | Female   | 57       |    | 21                | 0.36842105 | 2.024               | 0.784 - 5.226 | 0.145   |
| <b>MRI</b>            | Striatum | Abnormal | 79 | 23                | 29.11%     | 1.169               | 0.292 - 4.674 | 0.826   |
|                       |          | Normal   | 24 | 10                | 41.67%     |                     |               |         |
|                       | Thalamus | Abnormal | 60 | 16                | 26.67%     | 0.41                | 0.128 - 1.309 | 0.132   |
|                       |          | Normal   | 43 | 17                | 39.53%     |                     |               |         |
| Cortex                | Abnormal | 83       | 25 | 30.12%            | 0.547      | 0.159 - 1.874       | 0.337         |         |
|                       | Normal   | 20       | 8  | 0.4               |            |                     |               |         |
| <b>Constant</b>       |          |          |    |                   |            | 8.89                |               | 0.257   |

**H. Logistic regression for variables affecting presence of agitated features in sCJD (in 103 patients)**

| Independent variables |          | Total    |    | With BPS at onset |            | Logistic Regression |               |         |
|-----------------------|----------|----------|----|-------------------|------------|---------------------|---------------|---------|
|                       |          | n        |    | n                 | %          | Odds Ratio          | 95% CI        | p value |
| <b>Age at Onset</b>   | Per year |          |    |                   |            | 0.969               | 0.913 - 1.029 | 0.304   |
| <b>PRNP Codon 129</b> | MM       | 46       |    | 5                 | 10.87%     | 1                   | (ref)         | 0.179   |
|                       | MV       | 33       |    | 9                 | 27.27%     | 3.327               | 0.92 - 12.038 | 0.067   |
|                       | VV       | 24       |    | 4                 | 16.67%     | 1.585               | 0.34 - 7.386  | 0.558   |
| <b>Gender</b>         | Male     | 46       |    | 7                 | 15.22%     | 1                   | (ref)         |         |
|                       | Female   | 57       |    | 11                | 0.19298246 | 1.812               | 0.575 - 5.709 | 0.31    |
| <b>MRI</b>            | Striatum | Abnormal | 79 | 14                | 17.72%     | 1.452               | 0.259 - 8.14  | 0.671   |
|                       |          | Normal   | 24 | 4                 | 16.67%     |                     |               |         |
|                       | Thalamus | Abnormal | 60 | 10                | 16.67%     | 0.5                 | 0.124 - 2.023 | 0.331   |
|                       |          | Normal   | 43 | 8                 | 18.60%     |                     |               |         |
| Cortex                | Abnormal | 83       | 15 | 18.07%            | 1.049      | 0.224 - 4.921       | 0.951         |         |
|                       | Normal   | 20       | 3  | 0.15              |            |                     |               |         |
| <b>Constant</b>       |          |          |    |                   |            | 0.675               |               | 0.863   |

**I. Logistic regression of MRC-PDS score and Disease Type vs Hallucinations**

|                  |           | Logistic Regression |                      |                  |
|------------------|-----------|---------------------|----------------------|------------------|
|                  |           | Odds Ratio          | 95% CI               | p value          |
| <b>MRC Score</b> | Per point | <b>0.935</b>        | <b>0.909 - 0.963</b> | <b>&lt;0.001</b> |
| <b>Diagnosis</b> | sCJD      | <b>1</b>            | <b>(ref)</b>         | <b>&lt;0.001</b> |
|                  | vCJD      | <b>0.327</b>        | <b>0.122 - 0.874</b> | <b>0.026</b>     |
|                  | iCJD      | 1.334               | 0.461 - 3.864        | 0.595            |
|                  | IPD OPRI  | <b>0.083</b>        | <b>0.025 - 0.279</b> | <b>&lt;0.001</b> |
|                  | IPD Point | <b>0.254</b>        | <b>0.121 - 0.531</b> | <b>&lt;0.001</b> |
|                  | Constant  | <b>0.783</b>        |                      | 0.171            |

**J. Logistic regression of MRC-PDS score and Disease Type vs Depressive Symptoms**

|                  |           | Logistic Regression |               |                  |
|------------------|-----------|---------------------|---------------|------------------|
|                  |           | Odds Ratio          | 95% CI        | p value          |
| <b>MRC Score</b> | Per point | 0.981               | 0.961 - 1.002 | 0.078            |
| <b>Diagnosis</b> | sCJD      | <b>1</b>            | <b>(ref)</b>  | <b>0.328</b>     |
|                  | vCJD      | 1.31                | 0.661 - 2.597 | 0.439            |
|                  | iCJD      | 0.601               | 0.167 - 2.16  | 0.435            |
|                  | IPD OPRI  | 0.644               | 0.37 - 1.12   | 0.119            |
|                  | IPD Point | 0.858               | 0.497 - 1.482 | 0.583            |
|                  | Constant  | <b>0.412</b>        |               | <b>&lt;0.001</b> |
